# Supplementary material for: The Influence of 150-Cavity Binders on the Dynamics of Influenza A Neuraminidases as Revealed by Molecular Dynamics Simulations and Combined Clustering
Source: PubMed Central journal article supplement (PMC3609799; doi:10.1371/journal.pone.0059873), 2013-03-27

# Supporting Information

## Text S9

### Root Mean Squared Deviation of Heavy Active Site Atoms of N2 Systems

All values relative to post-minimization structure (pre-equilibration)  
common to the triplicate runs.

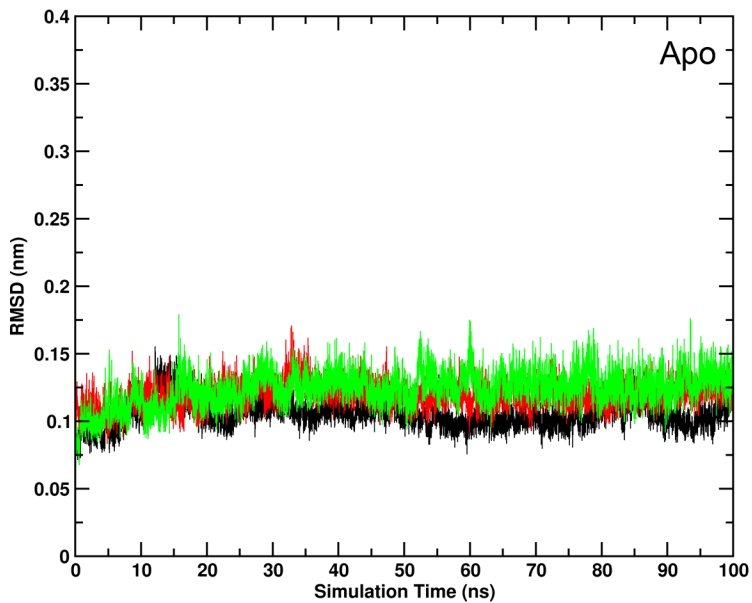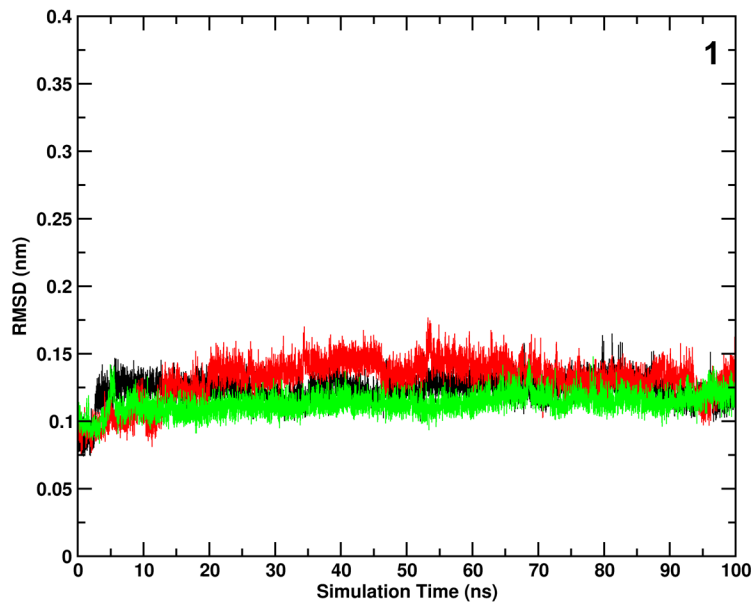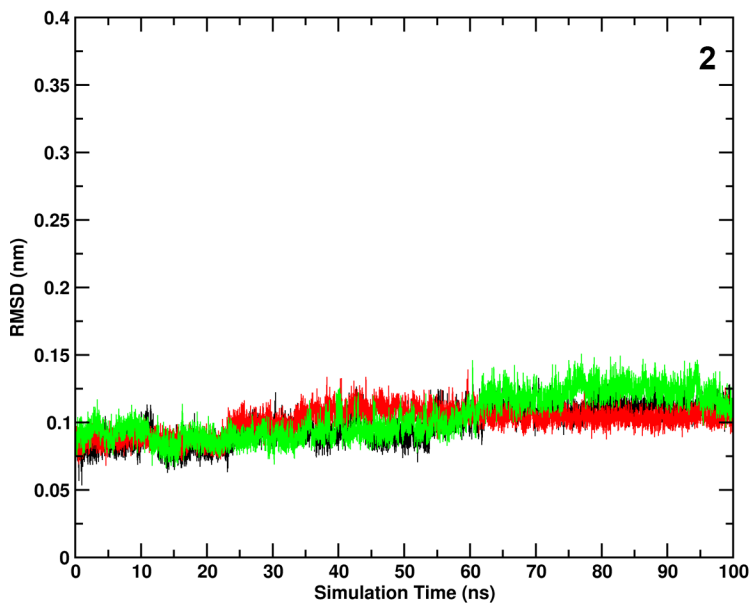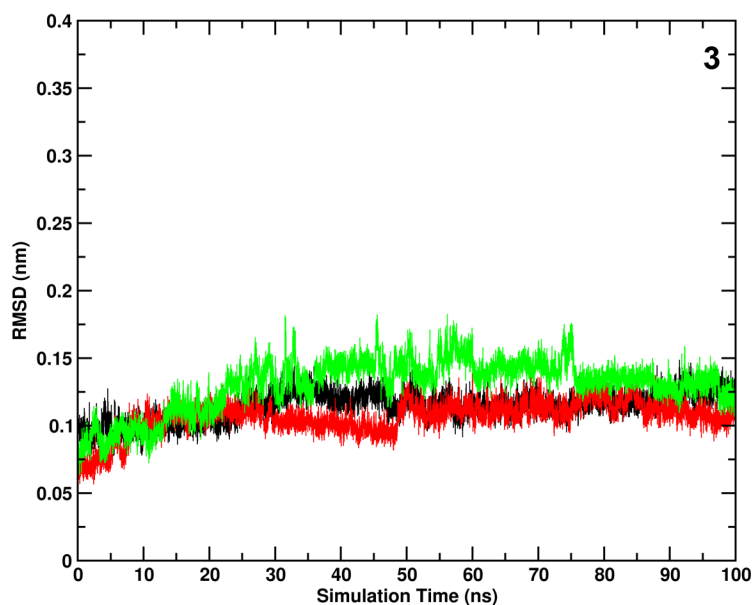

# Supporting Information

## Text S9

### Root Mean Squared Deviation of Heavy Active Site Atoms of N2 Systems

All values relative to post-minimization structure (pre-equilibration)  
common to the triplicate runs.

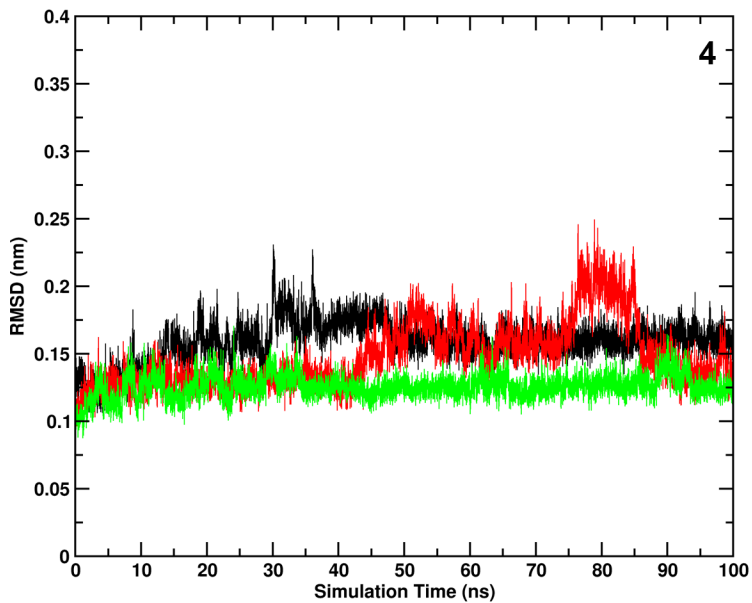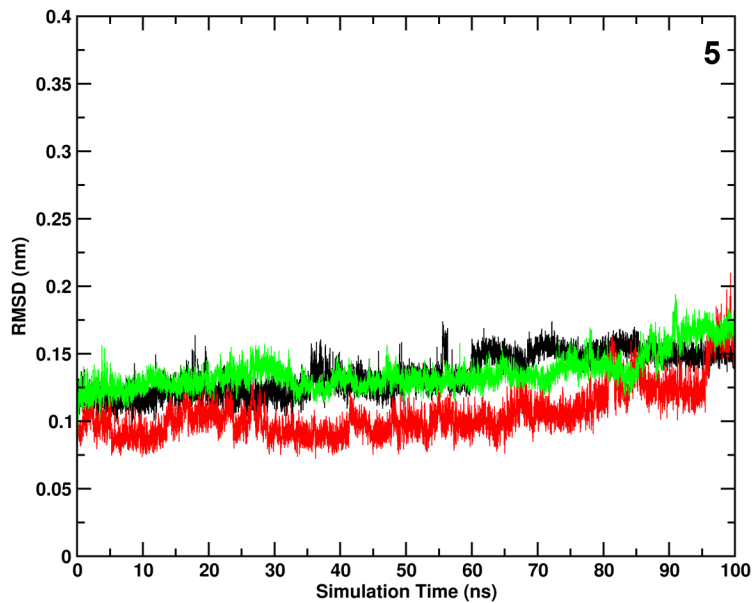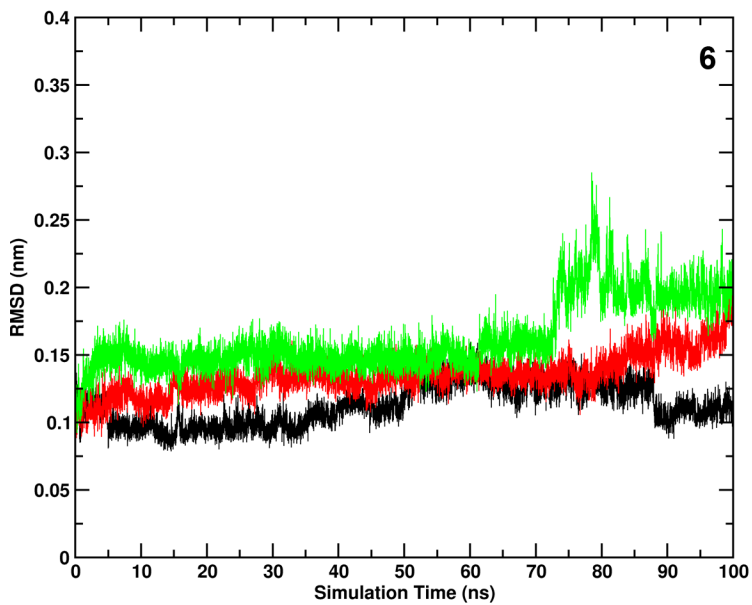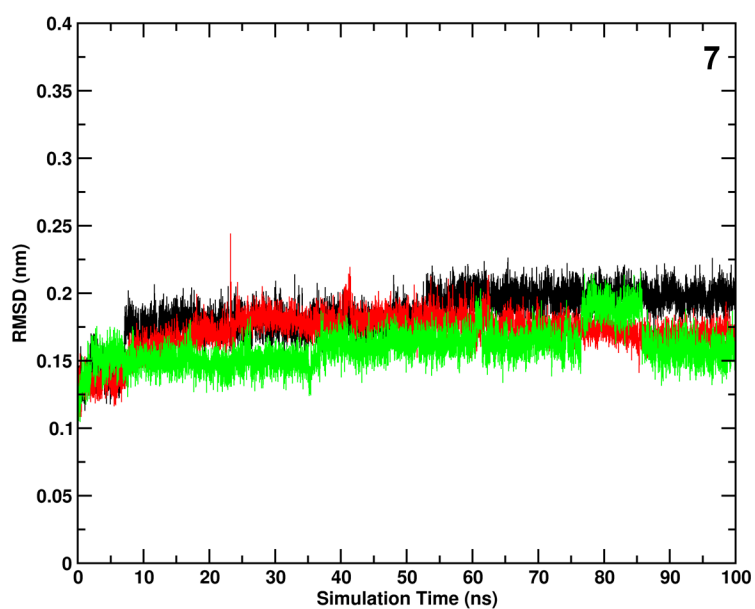

# Supporting Information

## Text S9

### Root Mean Squared Deviation of Heavy Active Site Atoms for N109 Systems

All values relative to post-minimization structure (pre-equilibration)  
common to the triplicate runs.

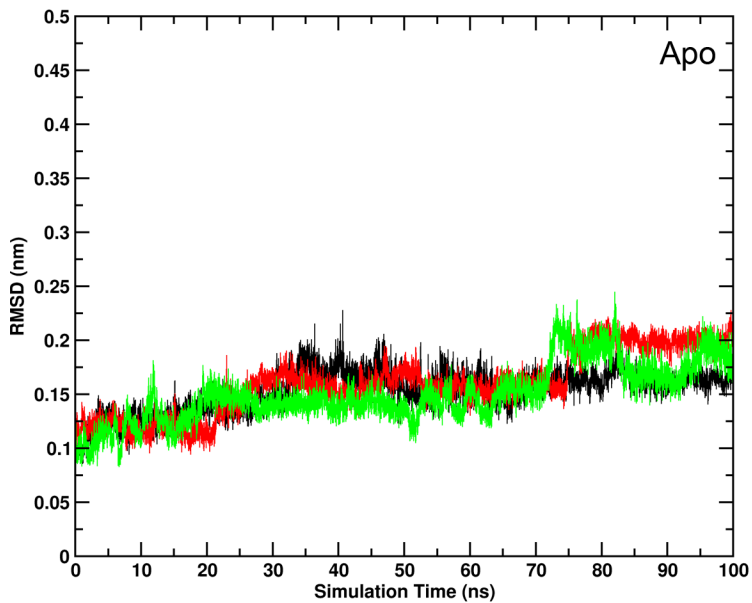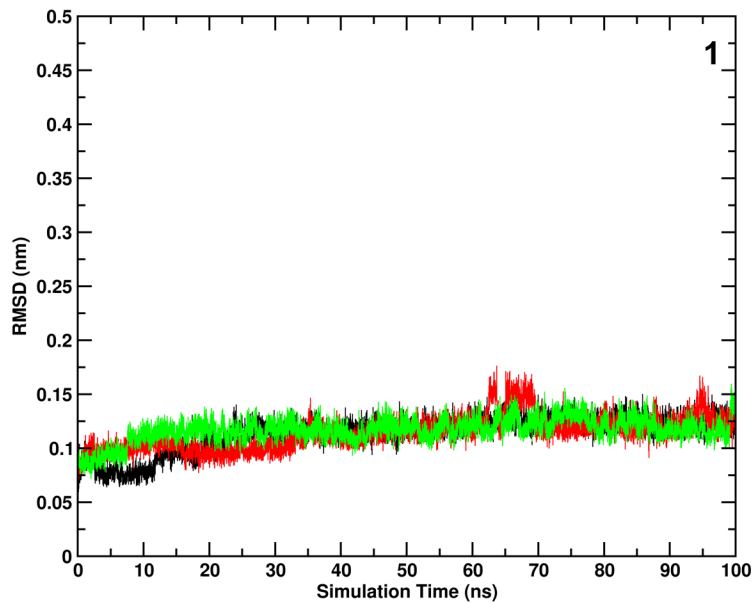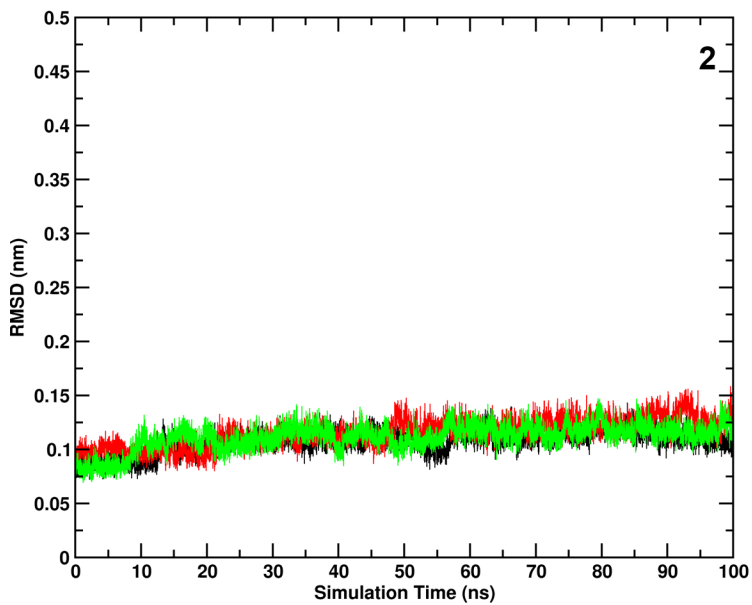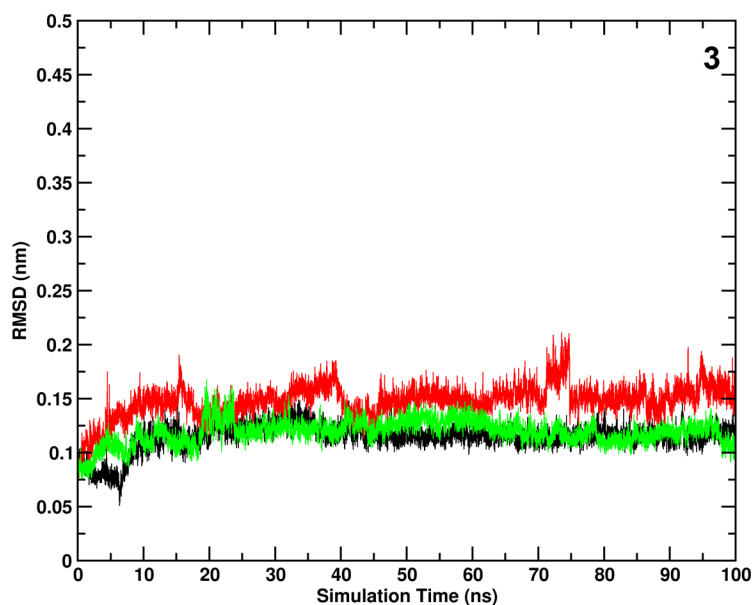

# Supporting Information

## Text S9

### Root Mean Squared Deviation of Heavy Active Site Atoms for N109 Systems

All values relative to post-minimization structure (pre-equilibration)  
common to the triplicate runs.

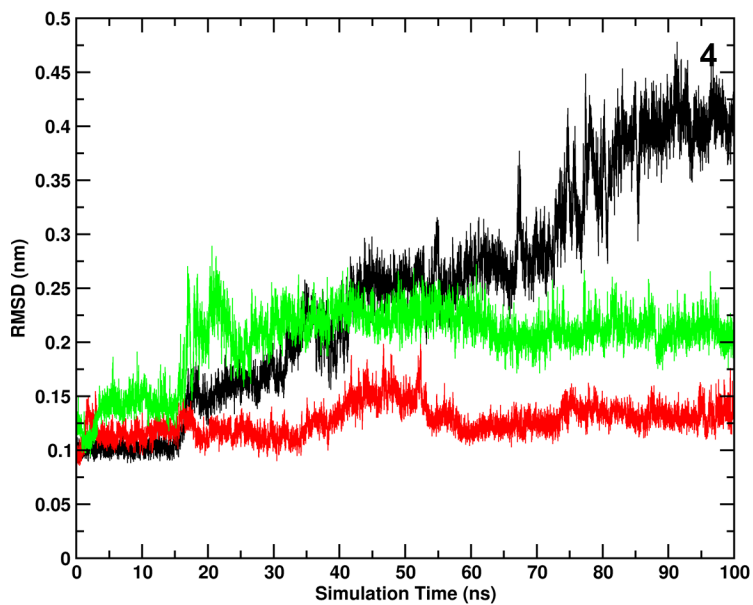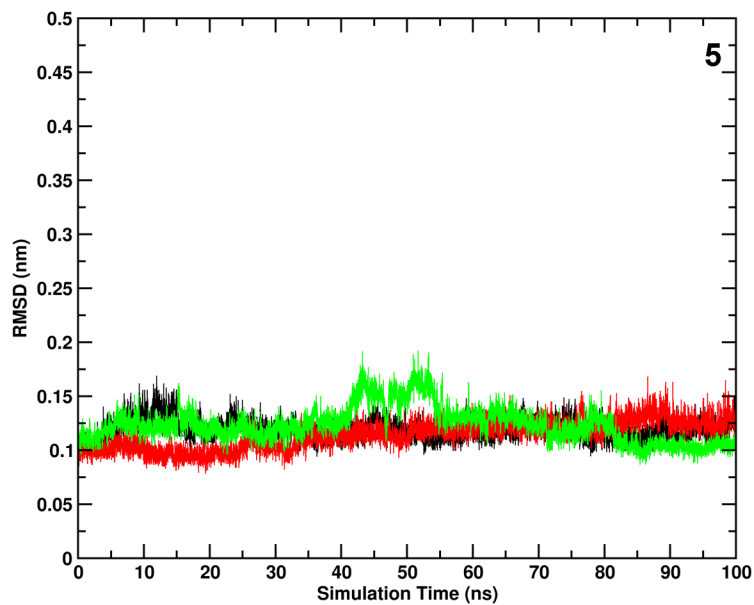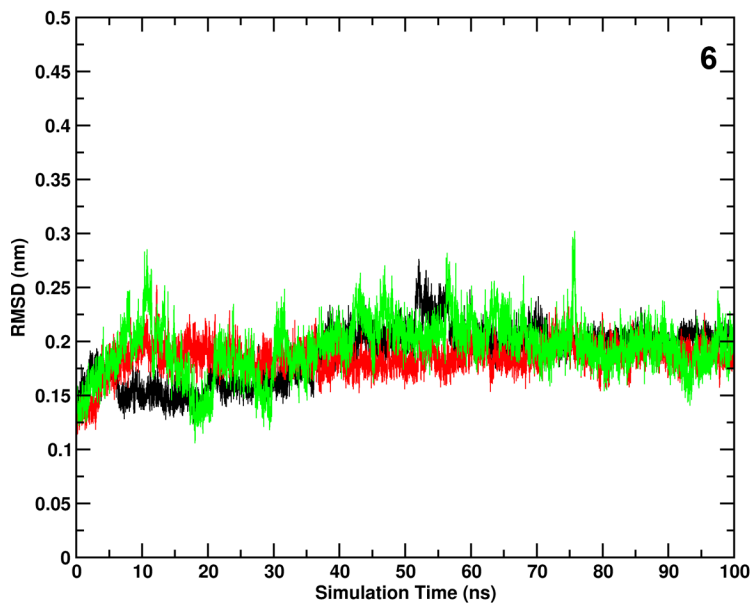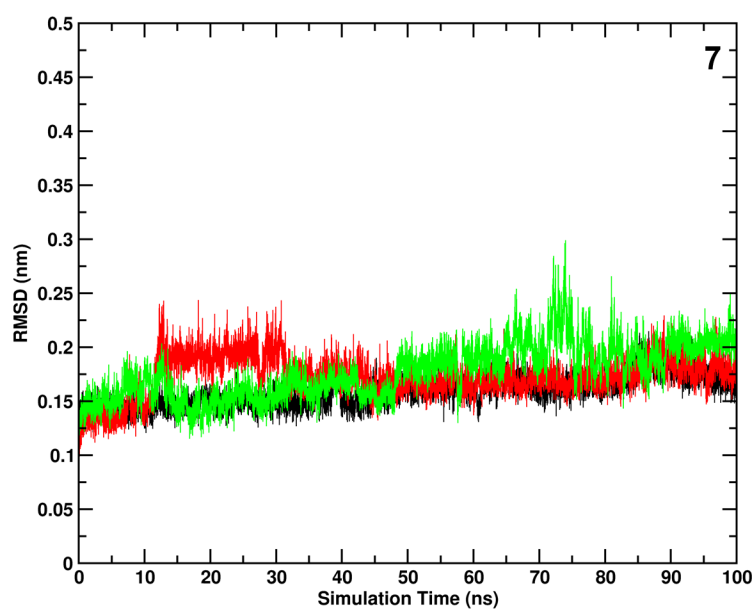

# Supporting Information

## Text S9

### Root Mean Squared Deviation of Heavy Active Site Atoms for N8<sub>closed</sub> Systems

All values relative to post-minimization structure (pre-equilibration)  
common to the triplicate runs.

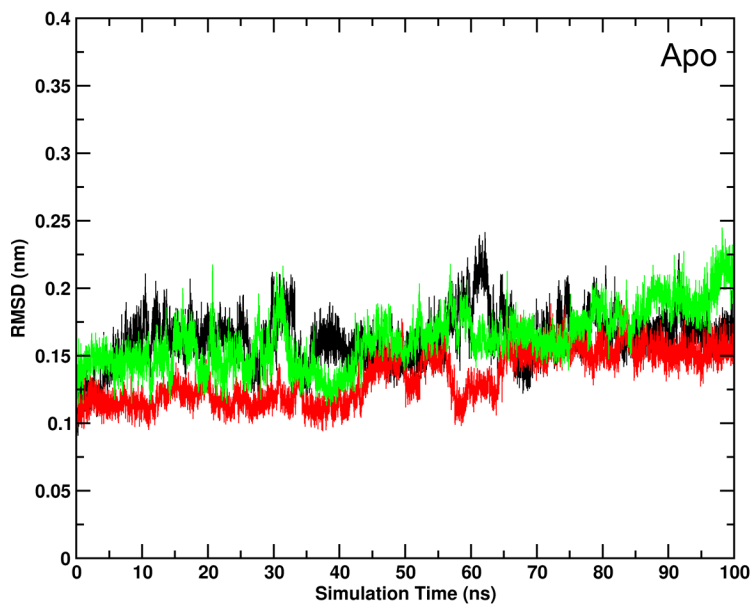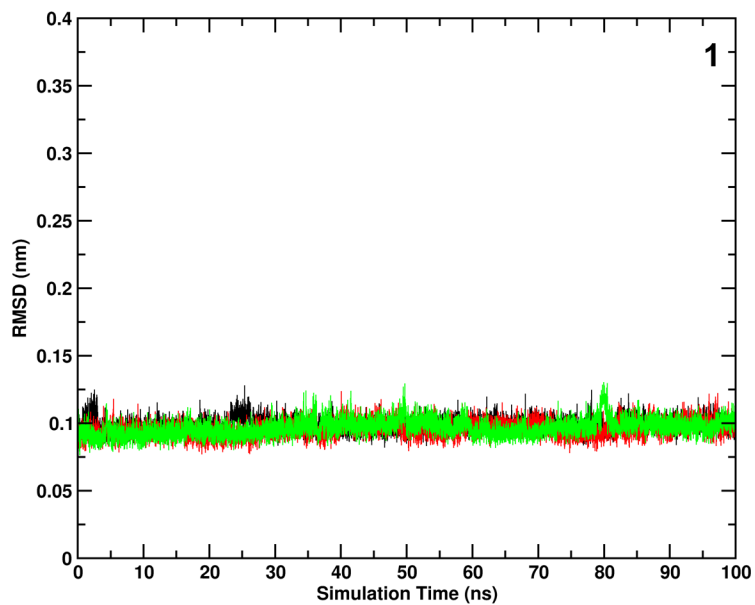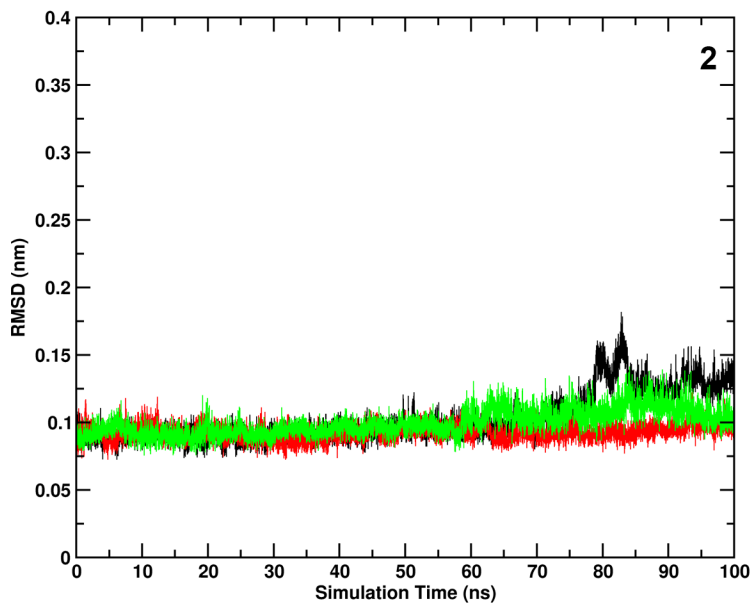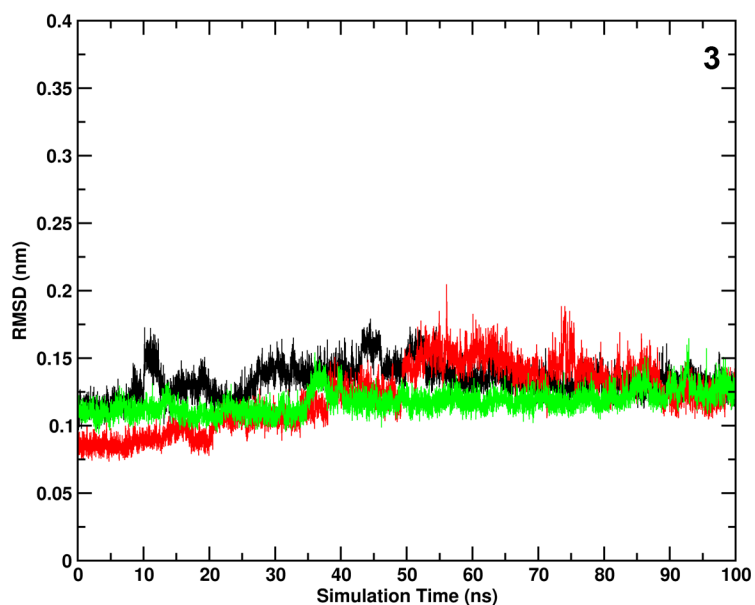

# Supporting Information

## Text S9

### Root Mean Squared Deviation of Heavy Active Site Atoms for N8<sub>closed</sub> Systems

All values relative to post-minimization structure (pre-equilibration)  
common to the triplicate runs.

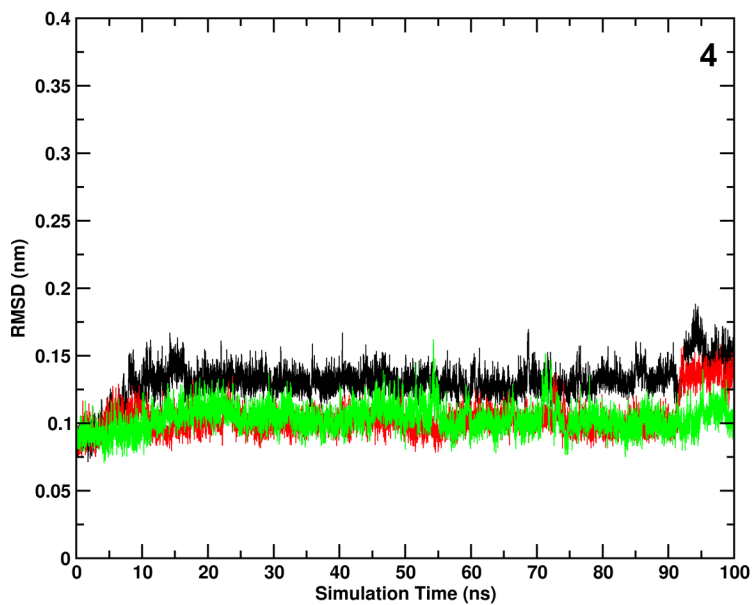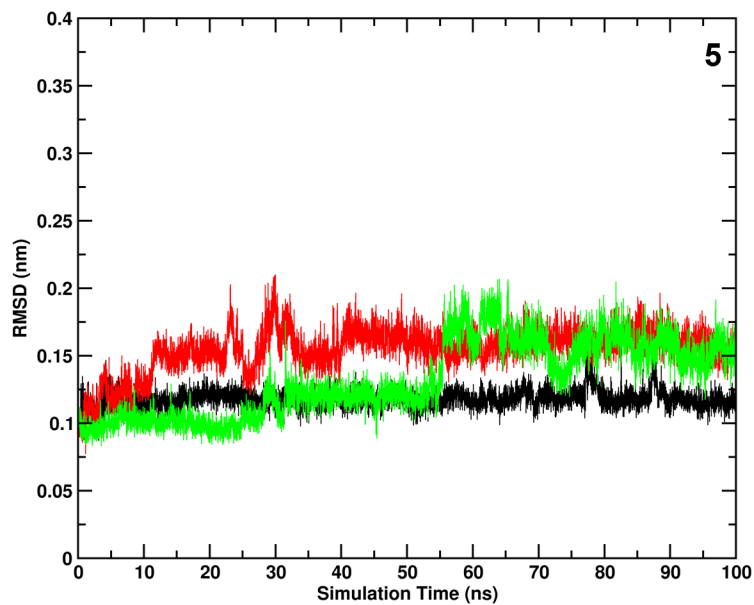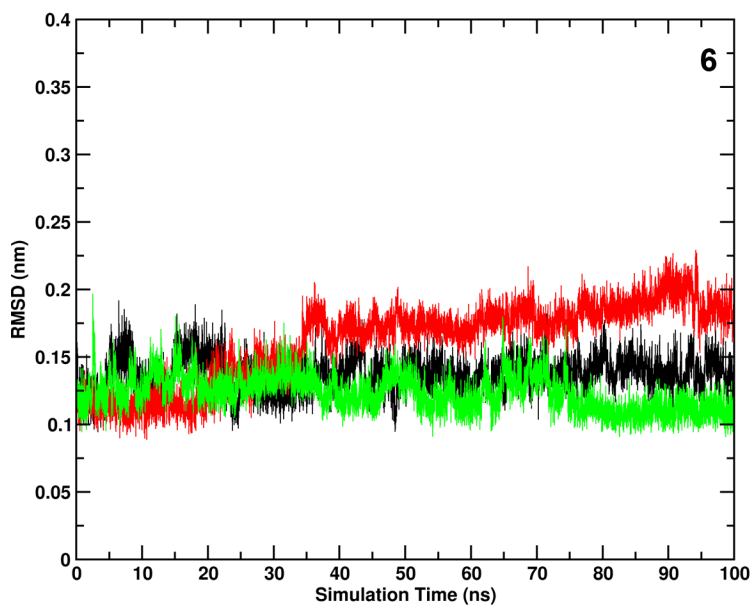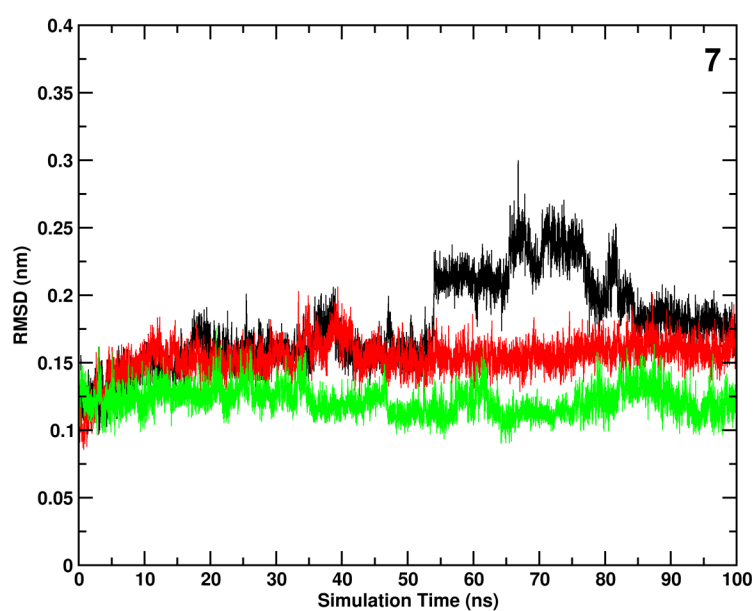

# Supporting Information

## Text S9

### Root Mean Squared Deviation of Heavy Active Site Atoms for N8<sub>open</sub> Systems

All values relative to post-minimization structure (pre-equilibration)  
common to the triplicate runs.

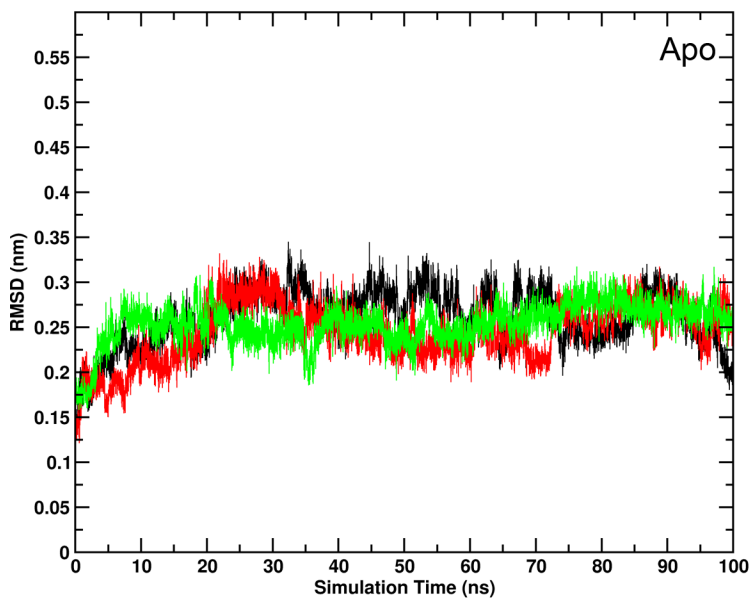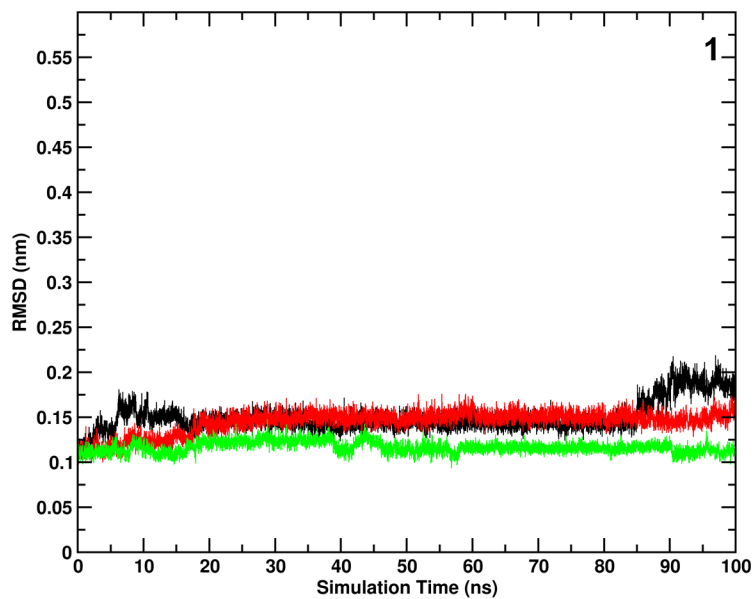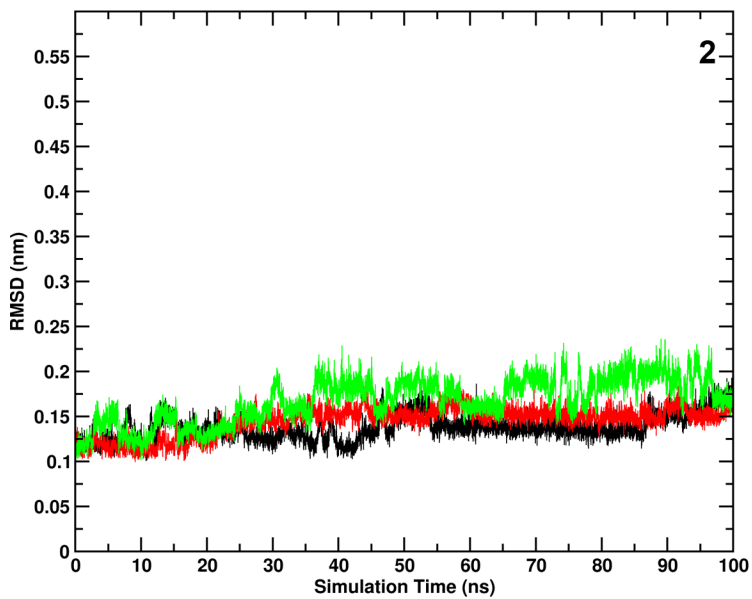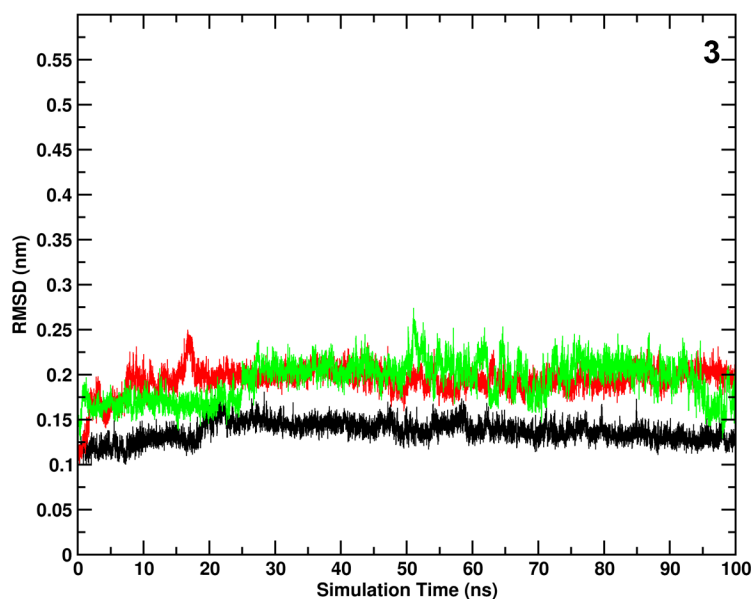

# Supporting Information

## Text S9

### Root Mean Squared Deviation of Heavy Active Site Atoms for N8<sub>open</sub> Systems

All values relative to post-minimization structure (pre-equilibration)  
common to the triplicate runs.

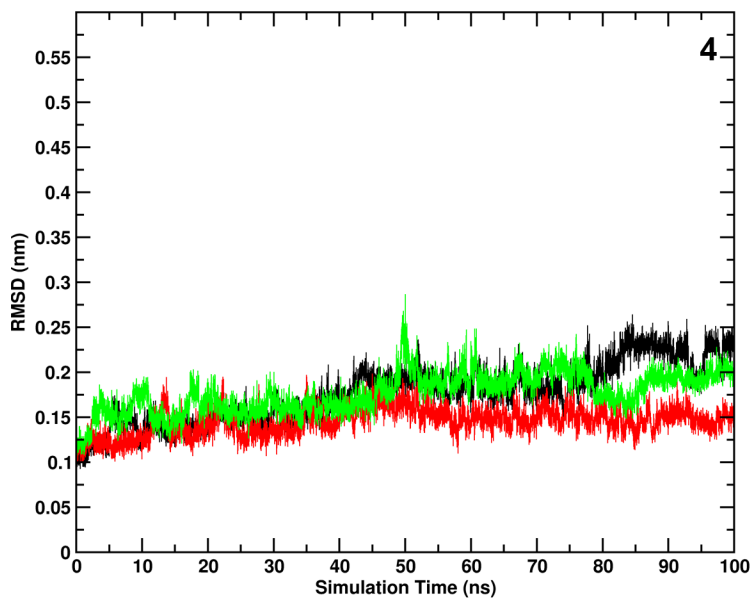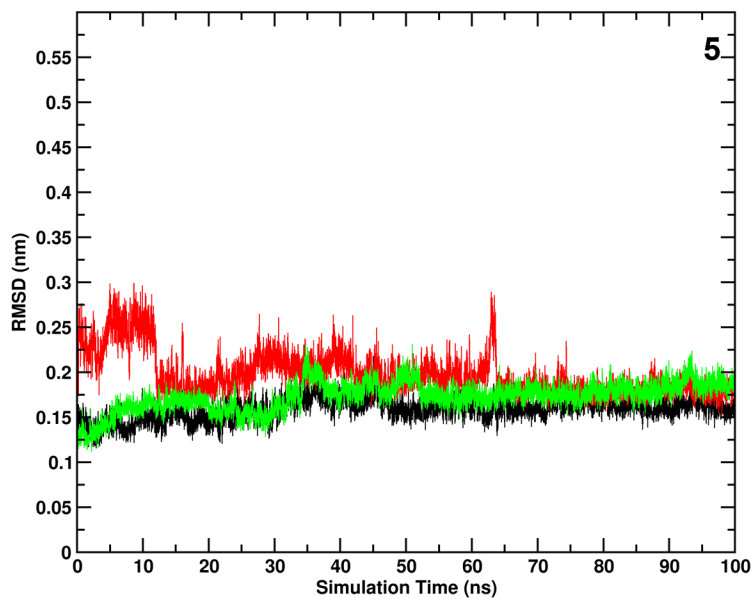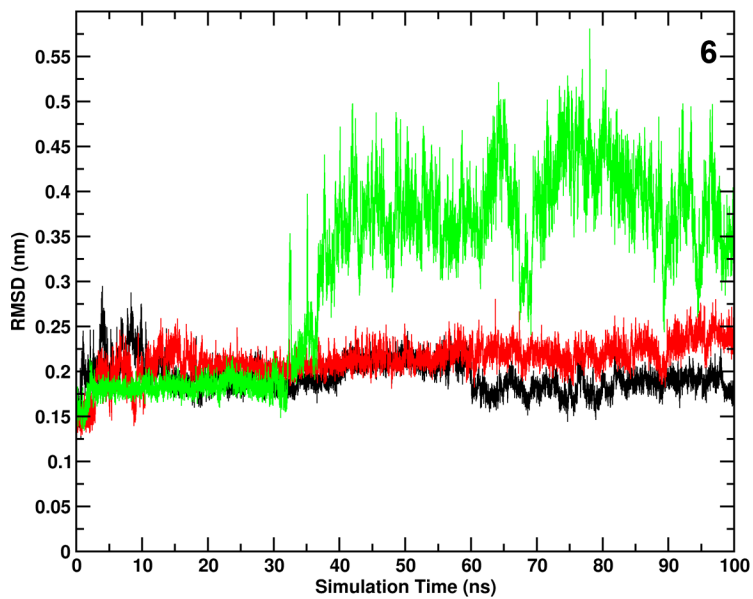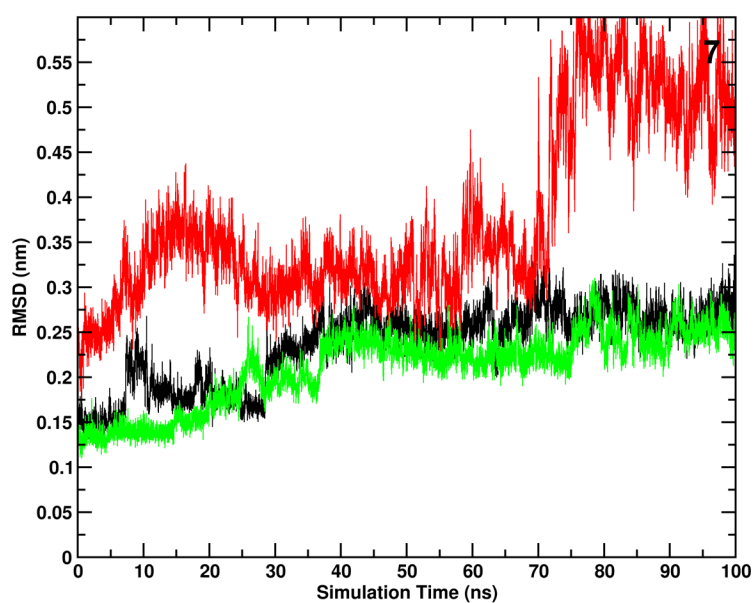

Supplement: pone.0059873.s010.pdf [file pone.0059873.s010.pdf]
